# Supplementary material for: A Label-Free, Mix-and-Detect ssDNA-Binding Assay Based on Cationic Conjugated Polymers
Source: MDPI journal article supplement (doi:10.3390/bios13010122), 2023-01-10
Supplement: s1 [file s1]

Supplementary Information

# A Label-Free, Mix-and-Detect ssDNA-Binding Assay Based on Cationic Conjugated Polymers

Pengbo Zhang <sup>1,2</sup>, Mohamad Zandieh <sup>2</sup>, Yuzhe Ding <sup>2</sup>, Lyuyuan Wu <sup>2</sup>, Xiaoyu Wang <sup>3</sup>, Juewen Liu <sup>2,\*</sup> and Zhengping Li <sup>1,\*</sup>

<sup>1</sup> School of Chemistry and Biological Engineering, University of Science and Technology Beijing, 30 Xueyuan Road, Haidian District, Beijing 100083, China

<sup>2</sup> Department of Chemistry, Waterloo Institute for Nanotechnology, University of Waterloo, 200 University Avenue West, Waterloo, ON N2L 3G1, Canada

<sup>3</sup> School of Materials Science and Engineering, University of Science and Technology Beijing, 30 Xueyuan Road, Haidian District, Beijing 100083, China

\* Correspondence: liujw@uwaterloo.ca (J.L.); lzpbd@ustb.edu.cn (Z.L.)

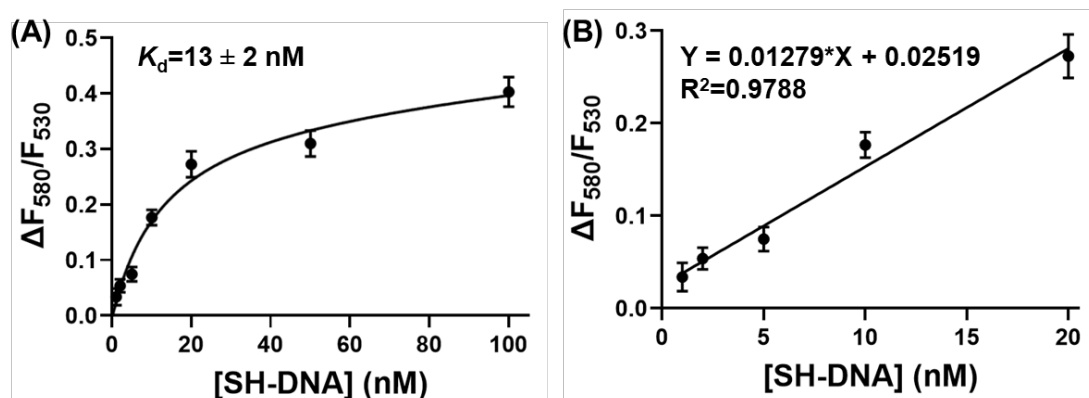

**Figure S1.** (A) The fluorescence ratio of PMNT as a function of SH-ssDNA concentration. (B) The linear response at 1 to 20 nM SH-ssDNA. The concentration of PMNT was 5  $\mu$ M.

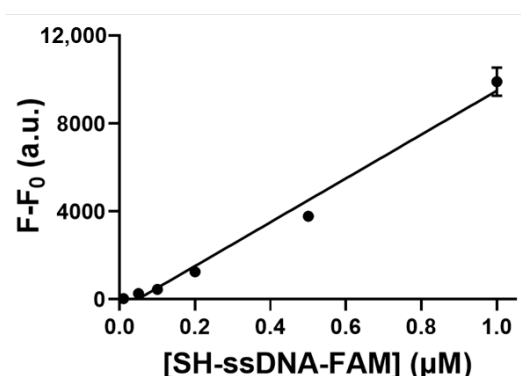

**Figure S2.** The fluorescence intensity changes of SH-ssDNA-FAM in response to ssDNA concentration.

**Table S1.** The sequences of ssDNA used in this work.

| Names               | Sequences (5'-3')               |
|---------------------|---------------------------------|
| <b>ssDNA</b>        | CCCAGGTTCTCTTCACAGATGCGT        |
| <b>cDNA</b>         | ACGCATCTGTGAAGAGAACCTGGG        |
| <b>ssDNA-FAM</b>    | CCCAGGTTCTCTTCACAGATGCGT-FAM    |
| <b>SH-ssDNA</b>     | SH-AAAAAAAAAACCCAGGTTCTCT       |
| <b>SH-ssDNA-FAM</b> | SH- AAAAAAAAAAACCCAGGTTCTCT-FAM |
| <b>A30</b>          | AAAAAAAAAAAAAAAAAAAAAAAAAAAAA   |
| <b>T30</b>          | TTTTTTTTTTTTTTTTTTTTTTTTTTTTT   |
| <b>G18</b>          | GGGGGGGGGGGGGGGGGGGG            |
| <b>C30</b>          | CCCCCCCCCCCCCCCCCCCCCCCCCCCCC   |

**Table S2.** The quantification of ssDNA on AuNPs using our CCP-based ssDNA binding assay.

| DNA type      | Supernatant | KCN released | Average ssDNA number on a single AuNP |
|---------------|-------------|--------------|---------------------------------------|
| Unlabeled DNA | 39.9 nM     | 50.8 nM      | 26                                    |
|               | 41.9 nM     | 61.0 nM      |                                       |
|               | 38.4 nM     | 45.7 nM      |                                       |
| Thiolated DNA | 1.3 µM      | 1.4 µM       | 130                                   |
|               | 1.5 µM      | 1.3 µM       |                                       |
|               | 1.5 µM      | 1.2 µM       |                                       |
